# Supplementary material for: Maternal Health Service Uptake Is Associated with a Higher Skin‐to‐Skin Care Practice in Ethiopia: Result from a National Survey
Source: Hindawi journal article supplement (doi:10.1155/2020/8841349), 2020-01-01
Supplement: f1 [file 8841349.f1.pdf]

**Table S1: Explanatory variables categorization and coding**

| <b>Variables</b>         | <b>Category coding</b>                                                                                                                                         |
|--------------------------|----------------------------------------------------------------------------------------------------------------------------------------------------------------|
| Maternal age at delivery | 1. $\leq 18$<br>2. 19-34<br>3. $\geq 35$                                                                                                                       |
| Place of residence       | 1. urban<br>2. rural                                                                                                                                           |
| Regions                  | 1. Tigray<br>2. Afar<br>3. Amhara<br>4. Oromia<br>5. Somali<br>6. Benishangul-Gumuz<br>7. SNNPR<br>8. Gambela<br>9. Harari<br>10. Addis Ababa<br>11. Dire Dawa |
| Antenatal care visits    | 0. No visit<br>1. 1-4 visits<br>2. $>4$ visits                                                                                                                 |
| Place of delivery        | 0. home<br>1. health facility                                                                                                                                  |

|                              |                                                                                                                                           |
|------------------------------|-------------------------------------------------------------------------------------------------------------------------------------------|
| Wealth index quintile        | <ol style="list-style-type: none"> <li>1. poorest</li> <li>2. poorer</li> <li>3. middle</li> <li>4. richer</li> <li>5. richest</li> </ol> |
| Maternal education           | <ol style="list-style-type: none"> <li>0. no formal education</li> <li>1. primary</li> <li>2. secondary</li> <li>3. higher</li> </ol>     |
| Sex of child                 | <ol style="list-style-type: none"> <li>1. male</li> <li>2. female</li> </ol>                                                              |
| Cesarean section delivery    | <ol style="list-style-type: none"> <li>0. No</li> <li>1. Yes</li> </ol>                                                                   |
| Employment status            | <ol style="list-style-type: none"> <li>0. Not employed</li> <li>1. Employed</li> </ol>                                                    |
| Marital status               | <ol style="list-style-type: none"> <li>1. Never in union</li> <li>2. Currently in union</li> <li>3. Formerly in union</li> </ol>          |
| Perceived baby size at birth | <ol style="list-style-type: none"> <li>1. Small</li> <li>2. Normal (average or above average)</li> </ol>                                  |
| Parity                       | <ol style="list-style-type: none"> <li>1. First birth</li> <li>2. Second birth or above</li> </ol>                                        |
| Childbirth attendant         | <ol style="list-style-type: none"> <li>1. Non-skilled attendant</li> </ol>                                                                |

|  |                                         |
|--|-----------------------------------------|
|  | 2. Skilled attendant<br>3. No attendant |
|--|-----------------------------------------|
