# Supplementary material for: Maternal Health Service Uptake Is Associated with a Higher Skin‐to‐Skin Care Practice in Ethiopia: Result from a National Survey
Source: Hindawi journal article supplement (doi:10.1155/2020/8841349), 2020-01-01
Supplement: f3 [file 8841349.f3.pdf]

Table S3: The distribution of birth assistance by region and residence, EDHS 2016

| Variables         | Birth attendant          |      |                              |      |                     |       | Chi-square test                      |
|-------------------|--------------------------|------|------------------------------|------|---------------------|-------|--------------------------------------|
|                   | <i>Skilled attendant</i> |      | <i>Non-skilled attendant</i> |      | <i>No attendant</i> |       |                                      |
|                   | Number                   | %    | Number                       | %    | Number              | %     |                                      |
| <b>Residence</b>  |                          |      |                              |      |                     |       |                                      |
| Urban             | 772                      | 83.8 | 117                          | 12.7 | 33                  | 3.5   | X <sup>2</sup> =118.10;<br>P ≤ 0.001 |
| Rural             | 1,658                    | 25.3 | 3,895                        | 59.3 | 1,013               | 15.4  |                                      |
| <b>Region</b>     |                          |      |                              |      |                     |       |                                      |
| Tigray            | 349                      | 65.9 | 166                          | 31.4 | 14                  | 2.7   | X <sup>2</sup> =31.64;<br>P ≤ 0.001  |
| Afar              | 13                       | 18.6 | 56                           | 81.4 | 0                   | 0     |                                      |
| Amhara            | 479                      | 29.8 | 1,055                        | 65.5 | 76                  | 4.7   |                                      |
| Oromia            | 768                      | 24.8 | 1,755                        | 56.6 | 576                 | 18.6  |                                      |
| Somali            | 57                       | 21.5 | 203                          | 76.5 | 6                   | 2.1   |                                      |
| Benishangul-Gumuz | 28                       | 35.3 | 35                           | 44.2 | 17                  | 20.5  |                                      |
| SNNPR             | 524                      | 33.0 | 710                          | 44.8 | 351                 | 22.2  |                                      |
| Gambela           | 10                       | 49.4 | 8                            | 40.3 | 2                   | 10.30 |                                      |

|             |     |      |   |      |     |     |
|-------------|-----|------|---|------|-----|-----|
| Harari      | 10  | 58.4 | 7 | 39.0 | 0.4 | 2.6 |
| Addis Ababa | 172 | 95.7 | 7 | 3.8  | 1   | 0.5 |
| Dire Dawa   | 21  | 63.2 | 9 | 27.7 | 3   | 9.1 |

---
